# Supplementary material for: Prenatal and Intrapartum Factors Associated With Infant Temperament: A Systematic Review
Source: PubMed Central journal article supplement (PMC8060501; doi:10.3389/fpsyt.2021.609020), 2021-04-08
Supplement: Data_Sheet_1.pdf [file Data_Sheet_1.pdf]

## Appendix 1. Inclusion, exclusion criteria and search strategy

---

|                           |                                                                                                                                    |
|---------------------------|------------------------------------------------------------------------------------------------------------------------------------|
| <b>Inclusion criteria</b> | Original research article,<br><br>Article written in English<br><br>Article targeted to infant who is up to 12 months old or under |
|---------------------------|------------------------------------------------------------------------------------------------------------------------------------|

---

|                           |                                                                                                                       |
|---------------------------|-----------------------------------------------------------------------------------------------------------------------|
| <b>Exclusion criteria</b> | Cross sectional studies investigated an association between postnatal mental status of parent and infant temperament. |
|---------------------------|-----------------------------------------------------------------------------------------------------------------------|

---

|                                                  |  |
|--------------------------------------------------|--|
| <b>Search strategy (Pubmed, MEDLINE, Scopus)</b> |  |
|--------------------------------------------------|--|

---

|     |                                                                                                                         |
|-----|-------------------------------------------------------------------------------------------------------------------------|
| #1  | perinatal OR antenatal OR pregnancy                                                                                     |
| #2  | (mental stress) OR (psychological stress) OR depression <b>【Mesh】</b> OR anxiety OR post traumatic stress <b>【Mesh】</b> |
| #3  | ((cocaine drug) OR (smoking) OR (alcohol) OR (drug) OR (cannabis))                                                      |
| #4  | factor OR determinant OR predictor                                                                                      |
| #5  | infant                                                                                                                  |
| #6  | Temperament                                                                                                             |
| #7  | #1 AND #2 AND #5 AND #6                                                                                                 |
| #8  | #1 AND #3 AND #5 AND #6                                                                                                 |
| #9  | #1 AND #4 AND #5 AND #6                                                                                                 |
| #10 | #7 OR #8 OR #9                                                                                                          |

---

## Appendix2. Summary results of selected articles

| Article N | Authors                 | Year | Country   | Design                         | Number                                                              | Assessment point                                              | Predictors                                                                      | Adjustment factors                                                                                                        | Measure assessed temperament                                                                    | Main findings                                                                                                                                                                                                                                                                                                                                                              |
|-----------|-------------------------|------|-----------|--------------------------------|---------------------------------------------------------------------|---------------------------------------------------------------|---------------------------------------------------------------------------------|---------------------------------------------------------------------------------------------------------------------------|-------------------------------------------------------------------------------------------------|----------------------------------------------------------------------------------------------------------------------------------------------------------------------------------------------------------------------------------------------------------------------------------------------------------------------------------------------------------------------------|
| 1         | Bush, N. R., et al.     | 2017 | USA       | Longitudinal observation study | 151                                                                 | T1: 12 –24 gestational weeks, T2: 6 months postpartum         | Stressful life events, perceived stress, low income, racial/ethnic minority     | Gestational age, birth weight, poverty, prenatal perceived stress, postnatal perceived stress, postnatal perceived health | Infant Behaviour Questionnaire - Revised (IBQ-R)                                                | Prenatal stress was associated with lower surgency ( $\beta = -0.23, p < 0.05$ ) and regulation ( $\beta = -0.33, p < 0.01$ ).                                                                                                                                                                                                                                             |
| 2         | Chong, S. C., et al.    | 2016 | Singapore | Longitudinal observation study | 1247                                                                | T1 : 26 gestational weeks T2: 3 months postpartum             | Antenatal depression, anxiety trait and state                                   | Age, ethnicity, marital status, household income, child care management                                                   | Early Infant Temperament Questionnaire (EITQ)                                                   | Maternal anxiety trait, state anxiety ( $p < 0.001$ ) were associated with negative emotionality and attentional regulation (anxiety trait $\beta = 0.31, p = 0.05$ , anxiety state $\beta = 0.42, p < 0.001$ ), whereas depression was not ( $p = 0.09$ ). Maternal perceived stress explained infants fussy difficult temperament slightly ( $\beta = 0.04, p < 0.05$ ). |
| 3         | Laplante, D. P., et al. | 2016 | Canada    | Longitudinal observation study | 121 (60 boys, 61 girls)                                             | T1: During pregnancy T2: 6 months postpartum                  | Disaster-related maternal stress                                                | Major life events, timing of exposure, maternal illness, objective hardship, subjective distress                          | Infant Characteristic Questionnaire (ICQ)                                                       | Maternal perceived stress explained infants fussy difficult temperament slightly ( $\beta = 0.04, p < 0.05$ ).                                                                                                                                                                                                                                                             |
| 4         | Nolvi, S., et al.       | 2016 | Finland   | Longitudinal observation study | 282                                                                 | T1: 14, 24, and 34 gestational weeks, T2: 6 months postpartum | Depression, anxiety, pregnancy-specific anxiety                                 | Maternal education, income, parity and civil status.                                                                      | Infant Behaviour Questionnaire-Revised (IBQ-R). 'Negative reactivity' subscale                  | Pregnancy specific anxiety is associated with negative emotional reactivity ( $\beta = 0.20, p < 0.001$ ), its aspects fearfulness ( $\beta = 0.15, p = 0.057$ ), and falling reactivity ( $\beta = -0.22, p < 0.001$ ).                                                                                                                                                   |
| 5         | Locke, R. L., et al.    | 2016 | USA       | Cohort study                   | 366 (cocaine opposed) 37 (opiate exposed) 522 (matched comparisons) | 4 months postpartum                                           | Mother's history of admission due to cocaine or opioids intake during pregnancy | Age, ethnic group, marital status, economic status, prenatal care                                                         | Infant Behaviour Questionnaire (IBQ), Observation of infant's behaviour in reaction to stimuli. | Cocaine and opiate exposed infants scored lower on IBQ smiling and laughter. Infants with heavy cocaine exposure were more likely in high social negative reactivity profile ( $p < 0.05$ ). Opiate-exposed infants were rated as less respondent to soothing ( $p < 0.05$ ).                                                                                              |

## Continued. Appendix 2

| No | Authors                        | Year | Country | Design                         | Number                                                                   | Assessment point                                                    | Predictors                                                                                               | Adjustment factors                                                                                       | Measure assessed temperament                                       | Main findings                                                                                                                                                                                                                                                                         |
|----|--------------------------------|------|---------|--------------------------------|--------------------------------------------------------------------------|---------------------------------------------------------------------|----------------------------------------------------------------------------------------------------------|----------------------------------------------------------------------------------------------------------|--------------------------------------------------------------------|---------------------------------------------------------------------------------------------------------------------------------------------------------------------------------------------------------------------------------------------------------------------------------------|
| 6  | Kantonen, T., et al.           | 2015 | Finland | Longitudinal observation study | 102                                                                      | T1: During pregnancy<br>T2: 6 months postpartum                     | Prenatal depression and pregnancy-related anxiety, alexithymic trait of mother                           | Maternal age, education, smoking in pregnancy, infant gender and gestational weight.<br>Prenatal anxiety | Infant Behaviour Questionnaire (IBQ)                               | Alexithymic traits of difficulty in identifying feelings predicted higher infant duration of orienting ( $\beta=0.08, p < 0.001$ ).                                                                                                                                                   |
| 7  | van den Heuvel, M., et al.     | 2015 | Sweden  | Longitudinal observation study | 90                                                                       | T1: Second trimester of pregnancy, T2: 10 months postpartum         | Mindfulness state during pregnancy                                                                       |                                                                                                          | Infant Behaviour Questionnaire-Revised Very Short Form (IBQ-R.VSF) | Higher maternal mindfulness during pregnancy was negatively assessed with infant self-regulation problems ( $\beta = -0.25, p < 0.001$ ) and less infant negative affectivity ( $\beta = -0.36, p < 0.001$ ). Prenatal anxiety mediated between mindfulness and infant temperament.   |
| 8  | Burnst, K.J., et al.           | 2014 | USA     | Cohort study                   | 95(Western American),<br>53(African American),<br>107(Hispanic American) | 6 months postpartum                                                 | Race, Negative life events during pregnancy, daily intakes of polyunsaturated fatty acids (PUFA)(n3, n6) | Maternal education, age, child's sex                                                                     | Infant Behaviour Questionnaire (IBQ)                               | Prenatal stress effect on infant orienting & regulation scores were modified by maternal n3:n6 ratios ( $p=0.03$ ). As NLEs increased, lower n3:n6 ratios predicted lower infant orienting & regulation scores, whereas higher n3:n6 ratios attenuated the effect of prenatal stress. |
| 9  | Lin, B., et al.                | 2014 | USA     | Longitudinal observation study | 77                                                                       | T1: During pregnancy, T2: 6 week postpartum, T3: 12 week postpartum | Prenatal stress                                                                                          | Not assessed                                                                                             | Infant Behaviour Questionnaire Revised (IBQ-R)                     | In Structural Equation Modeling (SEM), prenatal stress predicts higher levels of infant negativity ( $\beta=0.22, p < 0.001$ ) and surgency ( $\beta=0.22, p < 0.001$ ). Both of which directly or interactively predict later engagement in regulatory behaviours.                   |
| 10 | Rouse, M. H., & Goodman, S. H. | 2014 | USA     | Longitudinal observation study | 77                                                                       | T1: During pregnancy, T2: 3 months postpartum                       | Saliva cortisol, and major depression assessed by Structural Clinical Diagnosis (SCID).                  | Depression symptoms in other trimesters.                                                                 | Infant Behaviour Questionnaire Revised (IBQ-R)                     | Antenatal depression is associated with negative affectivity ( $\beta=-0.45, p < 0.001$ ). No significant mediate role of maternal cortisol between antenatal depression and temperament of infants.                                                                                  |

## Continued. Appendix 2

| No | Authors                  | Year | Country   | Design                         | Number                                                 | Assessment point                                                                 | Predictors                                       | Adjustment factors                                                                                                                                                                                                                                              | Measure assessed temperament                                                                             | Main findings                                                                                                                                                                                                                                                                                          |
|----|--------------------------|------|-----------|--------------------------------|--------------------------------------------------------|----------------------------------------------------------------------------------|--------------------------------------------------|-----------------------------------------------------------------------------------------------------------------------------------------------------------------------------------------------------------------------------------------------------------------|----------------------------------------------------------------------------------------------------------|--------------------------------------------------------------------------------------------------------------------------------------------------------------------------------------------------------------------------------------------------------------------------------------------------------|
| 11 | Baibazaro va, E., et al. | 2013 | UK        | Longitudinal observation study | 158                                                    | T1: 2nd trimester of pregnancy, T2: 3 months postpartum                          | Anxiety and birth weight                         | Maternal and placental cortisol                                                                                                                                                                                                                                 | Infant Behaviour Questionnaire-Revised (IBQR) 'distress to limitations'                                  | Lower birth weight is correlated with infant temperament (fear: $\beta = -0.16, p < 0.05$ , distress to limitation: $\beta = -0.18, p < 0.05$ ). However no significant relation between prenatal anxiety and infant temperament.                                                                      |
| 12 | Robinson, M., et al.     | 2013 | USA       | Longitudinal observation study | 2384                                                   | T1: During pregnancy, T2: 12 months postpartum                                   | Hypertensive disorder during pregnancy           | Maternal age, education, parity, pre-pregnancy maternal BMI, total family income, maternal smoking, the presence of the biological father in the family home, and the maternal stressful events, birth weight of child gestational age at birth, breastfeeding. | Australian revision of the Toddler Temperament Scale based on the Carey Infant Temperament Questionnaire | Maternal gestational hypertension increased the risk of difficult temperament of infants at 12 months (OR = 1.36) and preeclampsia increased the risk (OR = 2.17).                                                                                                                                     |
| 13 | McMahon, C. A., et al.   | 2013 | Australia | Cohort study                   | 250 (ART), 262 (Comparison)                            | T1: Third trimester of pregnancy, T2: 2 month postpartum, T3: 4 month postpartum | ART, general anxiety, pregnancy focused anxiety, | Gestational weeks when mothers completed the anxiety assessment, child age, educational levels, marital status, gestational complications, prenatal depression. Smoking, alcohol intake.                                                                        | Short Temperament Scale for Infants                                                                      | Women conceiving through ART reported lower state and trait anxiety, but higher pregnancy-focused anxiety than their comparison groups ( $p < 0.001$ ). Pregnancy-related anxiety is not associated with difficult temperament. ART women reporting less difficult infant temperament ( $p < 0.001$ ). |
| 14 | Melchior, M., et al.     | 2012 | France    | Longitudinal observation study | 1903                                                   | T1: 24 gestational weeks, T2: 12 months postpartum                               | Antenatal depression: CES-D, Family income.      | Demographic factors: child age, sex, mother's age at birth, number of siblings, prenatal separation, and non-maternal care, premature birth, birth weight, duration of breastfeeding. Antenatal anxiety and postnatal depression                                | The EAS questionnaire                                                                                    | Combination of maternal antenatal depression and lower family income was associated with children's higher scores of emotionality ( $\beta = 0.57, p < 0.001$ ).                                                                                                                                       |
| 15 | Zerwas, S., et al.       | 2012 | Norway    | Cohort study                   | 3013(Diagnosed of eating disorders), 45964(Comparison) | T1: 2nd trimester, T2: 6 months postpartum                                       | Eating disorders: questionnaire based on DSM-IV  | Smoking, primiparity, postpartum depression and anxiety, preterm birth and low birth weight                                                                                                                                                                     | Infant Characteristic Questionnaire(ICQ) "Fussy/Difficult" subscale                                      | Children of mothers diagnosed of eating disorder showed higher score of fussiness than un-exposure group. (AN: OR = 3.04, BN: OR = 1.94, EDNOS: OR = 4.12, BED: OR = 1.66)                                                                                                                             |

## Continued. Appendix 2.

| No | Authors                | Year | Country     | Design                         | Number | Assessment point                                                                              | Predictors                                                                                                                                                                                    | Adjustment factors                                                                                                                                                                                  | Measure assessed temperament                    | Main findings                                                                                                                                                                                                                                         |
|----|------------------------|------|-------------|--------------------------------|--------|-----------------------------------------------------------------------------------------------|-----------------------------------------------------------------------------------------------------------------------------------------------------------------------------------------------|-----------------------------------------------------------------------------------------------------------------------------------------------------------------------------------------------------|-------------------------------------------------|-------------------------------------------------------------------------------------------------------------------------------------------------------------------------------------------------------------------------------------------------------|
| 16 | Macedo, A., et al.     | 2011 | Portugal    | Longitudinal observation study | 386    | T1: 37 gestational weeks, T2: 3 months postpartum                                             | Personality: Perfectionism (Multidimensional Perfectionism Scale; Self-oriented perfectionism (SOP), Socially Prescribed perfectionism (SPP), and Multidimensional Perfectionism Scale (MPS). | Depressive symptoms: BDI- II                                                                                                                                                                        | Ad hoc questions                                | A higher levels of adaptive perfectionism (Self-oriented perfectionism) was negatively related to difficult child ( $p < 0.05$ ).                                                                                                                     |
| 17 | Ivorra, J. L., et al.  | 2010 | Spain       | Longitudinal observation study | 317    | T1: 8 weeks postpartum, T2: 32 weeks postpartum                                               | Molecular genotypes of child (5HTT, DRD4, and MAO-A functional polymorphisms).                                                                                                                | Maternal depression and anxiety                                                                                                                                                                     | Mother and Baby Scale (MABS)                    | The irritability scores of MABS showed significant relationship of mother's anxiety interacted with the 5HTTgenes ( $\beta = 0.35$ , $p = 0.001$ ).                                                                                                   |
| 18 | Wiebe, S. A., et al.   | 2009 | USA         | Longitudinal observation study | 98     | T1: Before 28 gestation weeks, T2: 12, and 48 hrs of infant's delivery, T3: 4 week postpartum | Prenatal tobacco exposure, and gene environment interactions                                                                                                                                  | Maternal education, sex of child.                                                                                                                                                                   | Neonatal Temperament Assessment                 | In 4 week old neonates, genotype exposure interactions were observed for attention and irritable reactivity ( $p < 0.01$ ).                                                                                                                           |
| 19 | Roza, S. J., et al.    | 2008 | Netherlands | Cohort study                   | 7465   | T1: 2nd and 3rd trimester, T2: 6 months postpartum                                            | Fetal growth, IUGR                                                                                                                                                                            | Socio-economic status (education, smoking, national origin), obstetric and neonatal factors (gestational age at birth, parity) and others (infant sex, infant age, maternal anxiety and depression) | Infant Behavior Questionnaire - Revised (IBQ-R) | No significant association between Intra uterine growth restriction (IUGR) and infant's difficult temperament. After full adjustment, reduced fetal weight gain was only related to prolonged duration of orienting ( $\beta = -0.38$ , $p < 0.01$ ). |
| 20 | Pickett, K. E., et al. | 2008 | USA         | Cohort study                   | 18000  | T1: 9 months postpartum                                                                       | Smoking during pregnancy                                                                                                                                                                      | Age, alcohol intake, depression history, partner perpetrated domestic violence, marital status, child sex, birth weight of child economic status                                                    | Carey Infant Temperament Questionnaire (CITQ)   | Heavy or constant smoking during pregnancy were associated with low positive mood (OR = 1.17). Early quitting exerted a protective effect with decreased risk of distress to novelty (OR = 0.79) and irregularity (OR = 0.89).                        |

## Continued. Appendix 2

| No | Authors               | Year | Country | Design                         | Number | Assessment point                                                                                | Predictors                                                                               | Adjustment factors                                                                                                                                                                                | Measure assessed temperament                                                                                                         | Main findings                                                                                                                                                                                                                                                                 |
|----|-----------------------|------|---------|--------------------------------|--------|-------------------------------------------------------------------------------------------------|------------------------------------------------------------------------------------------|---------------------------------------------------------------------------------------------------------------------------------------------------------------------------------------------------|--------------------------------------------------------------------------------------------------------------------------------------|-------------------------------------------------------------------------------------------------------------------------------------------------------------------------------------------------------------------------------------------------------------------------------|
| 21 | Davis, E.P., et al.   | 2007 | USA     | Longitudinal observation study | 248    | T1: 19 gestation weeks, T2: 25 gestation weeks, T3: 31 gestation weeks, T4: 2 months postpartum | Placenta cortisol                                                                        | Postpartum depression and anxiety                                                                                                                                                                 | Infant Behaviour Questionnaire (IBQ) 'fear' subscale                                                                                 | Placenta cortisol at 25 gestation weeks predicted temperament negative reactivity ( $\beta = 0.23, p < 0.01$ ).                                                                                                                                                               |
| 22 | Niegel, S., et al.    | 2007 | Norway  | Cohort study                   | 29182  | T1: pregnancy, T2: 6m postpartum                                                                | Overweight, rapid early weight gain                                                      | Age, BMI pre-pregnancy, DM, Child sex                                                                                                                                                             | Infant Characteristic Questionnaire (ICQ)                                                                                            | Very small associations between fussy/difficult temperament and rapid weight gain during the first months of life during the first month postpartum (OR=1.06, 95%CI: 1.02-1.10).                                                                                              |
| 23 | Werner, E. A., et al. | 2007 | USA     | Longitudinal observation study | 50     | T1: During pregnancy, T2: 4 months postpartum                                                   | Fetal heart rate                                                                         | Psychiatric diagnoses by structured interview                                                                                                                                                     | Infant Behaviour Questionnaire (IBQ), Observed child reaction in the circumstance of novelty following Kagan <i>et al.</i> 's method | 3rd trimester fetus who showed HR increases during exposure to maternal stress were more likely to exhibit high motor reactivity in response to the novelty (OR = 1.23). No significant relationship between FHRchange and infant cry reactivity or low reactive temperament. |
| 24 | Weiss, S. J., et al.  | 2007 | USA     | Longitudinal observation study | 142    | T1: During pregnancy, T2: 6 months postpartum                                                   | Prenatal exposure to illegal drug (alcohol, marijuana, or other drugs)by maternal report | Maternal stress, maltreatment                                                                                                                                                                     | Revised Infant Temperament Questionnaire (RITQ)                                                                                      | Drug exposure accounted for 12 % of the variance in a child's likelihood of distractibility at the 6months of age ( $\beta = 0.36, p < 0.001$ ).                                                                                                                              |
| 25 | Martin, R. P., et al. | 2006 | USA     | Longitudinal observation study | 6401   | T1: 6 months postpartum, T2: 5 age, T3: 12 age                                                  | Maternal smoking during pregnancy                                                        | Psychiatric hospitalization, psychological distress during pregnancy, hospitalization for accidents, socioeconomic status, age, and symptoms of upper respiratory infection, nausea, child gender | Carey Infant Temperament Questionnaire (CITQ)                                                                                        | Infants of heavy smoking scored less stimulated and less biological irregular ( $p < 0.05$ ).                                                                                                                                                                                 |

## Continued Appendix 2.

| No | Authors                | Year | Country    | Design                         | Number                                                                            | Assessment point                                                                                                                       | Predictors                                                                              | Adjustment factors                 | Measure assessed temperament                                                                    | Main findings                                                                                                                                                                                                                                                                                                  |
|----|------------------------|------|------------|--------------------------------|-----------------------------------------------------------------------------------|----------------------------------------------------------------------------------------------------------------------------------------|-----------------------------------------------------------------------------------------|------------------------------------|-------------------------------------------------------------------------------------------------|----------------------------------------------------------------------------------------------------------------------------------------------------------------------------------------------------------------------------------------------------------------------------------------------------------------|
| 26 | Austin, M. P., et al.  | 2005 | Australia  | Longitudinal observation study | 970                                                                               | T1: Third trimester of pregnancy, T2: 4 to 6 months postpartum                                                                         | Antenatal anxiety trait, depression, obstetric factors (emergency caesarean section)    | Not assessed                       | The Short Infant Temperament Questionnaire (SITQ)                                               | The antenatal trait STAI significantly predicted maternal report of difficult temperament at 4 or 6 months independent of postnatal depression scores (OR = 2.66). Antenatal depression and perceived life event stress were not predictive of temperament.                                                    |
| 27 | Davis, E. P., et al.   | 2005 | USA        | Longitudinal observation study | 248                                                                               | T1: 19 gestation weeks, T2: 25 gestation weeks, T3: 31 gestation weeks, T4: 2 months postpartum                                        | Pregnancy corticotropin-releasing hormone (CRH) (Blood)                                 | Postpartum depression and anxiety  | Infant Behaviour Questionnaire-Revised (IBQ-R)                                                  | CRH at 25 gestation weeks was associated with infant temperament (fear and distress feeling) ( $p < 0.05$ ) but not at 19 or 31 gestation weeks.                                                                                                                                                               |
| 28 | Räikkönen, K., et al.  | 2004 | Finland    | Longitudinal observation study | 305                                                                               | T1: pregnancy, T2: 6 months postpartum                                                                                                 | Chocolate consumption during pregnancy, prenatal stress                                 | Psychosocial stress experience     | Infant Characteristic Questionnaire (ICQ)                                                       | Prenatal stress was associated with infant temperament. However chocolate consumption during pregnancy showed no significant relationship with infant's temperament ( $p < 0.01$ ).                                                                                                                            |
| 29 | De Weerth, C., et al.  | 2003 | Netherland | Longitudinal observation study | 17                                                                                | T1: 3rd trimester, T2: 1w postpartum, T3: 3w postpartum, T4: 5w postpartum, T5: 7w postpartum, T6: 18w postpartum, T7: 20 w postpartum | Cortisol level (Saliva)                                                                 | Not assessed                       | Infant Characteristic Questionnaire (ICQ), Behavioural observations taking an infant into bath. | A trend was found for the high cortisol infants to be delivered. In the categories, Emotion and Activity, the infants from the high prenatal cortisol levels during pregnancy had significantly higher scores than others ( $p < 0.05$ ).                                                                      |
| 30 | Edwards, E. P., et al. | 2001 | USA        | Cohort study                   | 94 (Paternal alcoholic), 17 (both alcoholic mother and father), 102 (comparisons) | T1: 12 months postpartum, T2: 18 months postpartum                                                                                     | Paternal alcoholism, antisocial behaviour, depression of parents, aggression of parents | Education, mother alcohol problems | Infant Characteristic Questionnaire (ICQ)                                                       | Infants of alcoholic father displayed more stubborn temperaments at age of 12m as univariate analysis ( $\beta = 0.22, p < 0.05$ ) and more externalizing problems at 18 months ( $\beta = 0.15, p < 0.05$ ). Internalizing problems are attributed to paternal depression comorbidity to paternal alcoholism. |

## Continued Appendix 2.

| No | Authors                  | Year | Country | Design                         | Number                                         | Assessment point                                                       | Predictors                           | Adjustment factors                                                          | Measure assessed temperament                       | Main findings                                                                                                                                                                                                                                                                                                                                                                  |
|----|--------------------------|------|---------|--------------------------------|------------------------------------------------|------------------------------------------------------------------------|--------------------------------------|-----------------------------------------------------------------------------|----------------------------------------------------|--------------------------------------------------------------------------------------------------------------------------------------------------------------------------------------------------------------------------------------------------------------------------------------------------------------------------------------------------------------------------------|
| 31 | Martin, R. P., et al.    | 1999 | Finland | Longitudinal observation study | 2948                                           | T1: Second trimester, T2: Third trimester, T3: 6 months postpartum     | Maternal nausea                      | General somatic and psychosomatic symptoms (depression, anxiety and stress) | Carey Infant Temperament Questionnaire (CITQ)      | Children whose mothers reported nausea in middle or late pregnancy had lower sensory thresholds and higher levels of activity and emotional intensity in infancy ( $p < 0.05$ ).                                                                                                                                                                                               |
| 32 | Zuckerman, B., et al.    | 1990 | USA     | Longitudinal observation study | 1123                                           | T1: During pregnancy, T2: Between 8 and 72 hours postpartum            | Prenatal depressive symptoms         | Ethnicity, age, gestational weeks, child gender, parity, substance use      | Neurologic and Adaptive Capacity Scale             | Prenatal depressive symptoms were associated with consolability and excessive crying of infant adjusting for sociodemographic factors.                                                                                                                                                                                                                                         |
| 33 | Blennow, P. I., et al.   | 1988 | Sweden  | Cohort study                   | 37 (Vacuum extraction cases), 27 (Comparisons) | T1: 6 months postpartum, T2: 1 year postpartum, T3: 2 years postpartum | Vacuum extraction method of delivery | Not assessed                                                                | Thomas and Chess's Temperament Questionnaire (TTQ) | Temperament was not systematically related to vacuum extraction delivery.                                                                                                                                                                                                                                                                                                      |
| 34 | Ross, G.                 | 1987 | USA     | Cohort study                   | 98 (Preterm delivery), 89 (Comparisons)        | T1: 12 months postpartum                                               | Preterm delivery, infant development | Not assessed                                                                | Toddler Temperament Scale (TTS)                    | Preterm and full term infants did not differ significantly on overall temperament type. Poorer performance on the Bayley Mental Scales was significantly associated with temperament characteristics of lower adaptability ( $r = 0.34$ , $p < 0.001$ ), lower persistence ( $r = 0.29$ , $p < 0.005$ ), and more withdrawal from new stimulation ( $r = 0.31$ , $p < 0.05$ ). |
| 35 | Torgersen, A. M., et al. | 1978 | Norway  | Longitudinal observation study | 53                                             | T1: 2 months postpartum, T2: 9 months postpartum                       | Genetic factors: MZ twin and DZ twin | Child's sex                                                                 | Thomas and Chess's Temperament Questionnaire (TTQ) | Monozygotic (MZ) twins were more similar than dizygotic (DZ) twins statistically significant with regard to temperament ( $p < 0.05$ ).                                                                                                                                                                                                                                        |



### Appendix 3. Results of quality assessment

| Article N. | Q1  | Q2  | Q3      | Q4  | Q5 | Q6  | Q7  | Q8  | Q9  | Q10 | Q11 | Q12 | Q13 | Q14 |
|------------|-----|-----|---------|-----|----|-----|-----|-----|-----|-----|-----|-----|-----|-----|
| 1          | Yes | Yes | Yes     | Yes | No | Yes | Yes | Yes | Yes | Yes | No  | No  | Yes | Yes |
| 2          | Yes | Yes | Yes     | No  | No | Yes | Yes | Yes | Yes | Yes | Yes | No  | No  | Yes |
| 3          | Yes | Yes | Yes     | Yes | No | Yes | Yes | Yes | Yes | Yes | Yes | No  | No  | Yes |
| 4          | Yes | Yes | Yes     | Yes | No | Yes | Yes | Yes | Yes | Yes | Yes | No  | No  | Yes |
| 5          | Yes | Yes | Yes     | Yes | No | Yes | Yes | Yes | Yes | Yes | Yes | No  | No  | Yes |
| 6          | Yes | Yes | Yes     | Yes | No | Yes | Yes | Yes | Yes | Yes | Yes | No  | No  | Yes |
| 7          | Yes | Yes | Yes     | Yes | No | Yes | Yes | Yes | Yes | Yes | Yes | No  | No  | Yes |
| 8          | Yes | Yes | Unknown | Yes | No | Yes | Yes | Yes | Yes | Yes | Yes | No  | Yes | Yes |
| 9          | Yes | Yes | Yes     | Yes | No | Yes | Yes | Yes | Yes | No  | Yes | No  | Yes | Yes |
| 10         | Yes | Yes | Yes     | Yes | No | Yes | Yes | Yes | Yes | No  | Yes | No  | Yes | Yes |
| 11         | Yes | Yes | Yes     | Yes | No | Yes | Yes | Yes | Yes | No  | Yes | No  | Yes | Yes |
| 12         | Yes | Yes | Yes     | Yes | No | Yes | Yes | Yes | Yes | Yes | Yes | No  | No  | Yes |
| 13         | Yes | Yes | Yes     | Yes | No | Yes | Yes | Yes | Yes | Yes | Yes | No  | No  | Yes |
| 14         | Yes | Yes | Yes     | Yes | No | Yes | Yes | Yes | Yes | Yes | Yes | No  | No  | Yes |
| 15         | Yes | Yes | Yes     | Yes | No | Yes | Yes | Yes | Yes | Yes | Yes | No  | No  | Yes |
| 16         | Yes | Yes | Unknown | Yes | No | Yes | Yes | Yes | Yes | Yes | Yes | No  | No  | Yes |
| 17         | Yes | Yes | Yes     | Yes | No | Yes | Yes | Yes | Yes | No  | Yes | No  | No  | Yes |
| 18         | Yes | Yes | Unknown | Yes | No | Yes | Yes | Yes | Yes | No  | Yes | No  | No  | Yes |
| 19         | Yes | Yes | Yes     | Yes | No | Yes | Yes | Yes | Yes | Yes | Yes | No  | No  | Yes |
| 20         | Yes | Yes | Yes     | Yes | No | Yes | Yes | Yes | Yes | Yes | Yes | No  | Yes | Yes |
| 21         | Yes | Yes | Yes     | Yes | No | Yes | Yes | Yes | Yes | Yes | Yes | No  | No  | Yes |
| 22         | Yes | Yes | Yes     | Yes | No | Yes | Yes | Yes | Yes | Yes | Yes | No  | No  | Yes |
| 23         | Yes | Yes | Yes     | Yes | No | Yes | Yes | Yes | Yes | No  | Yes | No  | No  | Yes |
| 24         | Yes | Yes | Yes     | Yes | No | Yes | Yes | Yes | Yes | No  | Yes | No  | No  | Yes |
| 25         | Yes | Yes | Unknown | Yes | No | Yes | Yes | Yes | Yes | No  | Yes | No  | No  | Yes |
| 26         | Yes | Yes | Unknown | Yes | No | Yes | Yes | Yes | Yes | No  | Yes | No  | No  | Yes |
| 27         | Yes | Yes | Unknown | Yes | No | Yes | Yes | Yes | Yes | Yes | Yes | No  | No  | Yes |
| 28         | Yes | Yes | Unknown | Yes | No | Yes | Yes | Yes | Yes | Yes | Yes | No  | No  | Yes |
| 29         | Yes | Yes | Unknown | Yes | No | Yes | Yes | Yes | Yes | Yes | Yes | No  | No  | Yes |

Continued. Appendix 3.

| Article N. | Q1  | Q2  | Q3      | Q4  | Q5 | Q6  | Q7  | Q8  | Q9  | Q10 | Q11 | Q12 | Q13 | Q14 |
|------------|-----|-----|---------|-----|----|-----|-----|-----|-----|-----|-----|-----|-----|-----|
| 30         | Yes | Yes | Unknown | Yes | No | Yes | Yes | Yes | Yes | No  | Yes | No  | No  | Yes |
| 31         | Yes | Yes | Unknown | Yes | No | Yes | Yes | Yes | Yes | No  | Yes | No  | No  | Yes |
| 32         | Yes | Yes | Unknown | Yes | No | Yes | Yes | Yes | Yes | No  | Yes | No  | No  | Yes |
| 33         | Yes | Yes | Yes     | Yes | No | Yes | Yes | Yes | Yes | No  | Yes | No  | No  | Yes |
| 34         | Yes | Yes | Unknown | Yes | No | Yes | Yes | Yes | Yes | No  | Yes | No  | No  | Yes |
| 35         | Yes | Yes | Unknown | Yes | No | Yes | Yes | Yes | Yes | No  | Yes | No  | No  | Yes |

NIH Study Quality Assessment Tool

Q1. Was the research question or objective in this paper clearly stated?

Q2. Was the study population clearly specified and defined?

Q3. Was the participation rate of eligible persons at least 50%?

Q4. Were all the subjects selected or recruited from the same or similar populations (including the same time period)? Were inclusion and exclusion criteria for being in the study prespecified and applied uniformly to all participants?

Q5. Was a sample size justification, power description, or variance and effect estimates provided?

Q6. For the analyses in this paper, were the exposure(s) of interest measured prior to the outcome(s) being measured?

Q7. Was the timeframe sufficient so that one could reasonably expect to see an association between exposure and outcome if it existed?

Q8. For exposures that can vary in amount or level, did the study examine different levels of the exposure as related to the outcome (e.g., categories of exposure, or exposure measured as continuous variable)?

Q9. Were the exposure measures (independent variables) clearly defined, valid, reliable, and implemented consistently across all study participants?

Q10. Was the exposure(s) assessed more than once over time?

Q11. Were the outcome measures (dependent variables) clearly defined, valid, reliable, and implemented consistently across all study participants?

Q12. Were the outcome assessors blinded to the exposure status of participants?

Q13. Was loss to follow-up after baseline 20% or less?

Q14. Were key potential confounding variables measured and adjusted statistically for their impact on the relationship between exposure(s) and outcome(s)?
